# Supplementary material for: On the exponent in the Von Bertalanffy growth model
Source: PeerJ. 2018 Jan 4;6:e4205. doi: 10.7717/peerj.4205 (PMC5756614; doi:10.7717/peerj.4205)
Supplement: Supplemental Information 1 [file peerj-06-4205-s001.xlsx]

## Sheet: Tabelle1
Data Set:	01		02		03		04		05		06		07		08		09		10		11		12		13		14		15		16		17		18		19		20		21		22		23		24		25
No\\type	age	weight	age	weight	age	weight	age	weight	age	weight	age	weight	age	weight	age	weight	age	weight	age	weight	age	weight	age	weight	age	weight	age	weight	age	weight	age	weight	age	weight	age	weight	age	weight	age	weight	age	weight	age	weight	age	weight	age	weight	age
1	4	430.369	3	166.375	2.12453	14.4245	0	0.509	1	7301.38	0.166667	30	0.25	32.4333	2	6668.67	0.5	0.300763	0	69857.3	3	70767.3	1	14.8869	1	2406.1	0	0.01	1	30212.5	1	729	0	198.185	6	2.72047e+07	3	8998912	2	1.25665e+07	6	16.069	0.75	0.857375	3	2361.49	1	81.6596	0
2	5	409.411	3.96	190.109	2.02126	15.568	2	3.1	2	13997.5	0.25	31.4636	0.416667	34.2	3	7055.89	1	0.571787	1	1.02625e+06	4	91258.4	2	16.0647	2	10743	7	0.015	2	11803.4	2	1466.56	1	426.523	7	3.50727e+07	4	16971493	3	1.48793e+07	18	80.1845	1	1.90662	4	4997.29	2	369.983	90
3	6	657.749	5.04	264.197	2.05982	18.5091	3	9.35	3	33939.6	0.333333	34.54	0.5	37.4	4	9716.43	1.5	2.35264	2	5.91281e+06	5	119710	3	28.5169	3	19436.2	14	0.03	3	16387.3	3	2183.27	2	818.28	8	39526250	5	8741816	4	1.70587e+07	30	236.992	1.25	2.46037	5	6303.12	3	743.677	60
4	9	523.509	6	551.368	2.4917	36.0566	4	9.8	4	41847.6	0.416667	35.7667	1	41.05	5	14776.1	2	3.24179	3	14471991	6	162827	4	36.577	4	32461.8	21	0.05	4	19930.5	4	3300.55	3	1172.79	9	4.22955e+07	6	1.69566e+07	5	2.04871e+07	42	377.438	1.5	3.04862	6	7764.28	4	1246.02	120
5	10	606.832	6.96	681.472	2.44452	37.8037	5	13.7	5	87482.9	0.5	38.2	1.08333	38.0333	6	16936	2.5	5.26802	4	2.65874e+07	7	183987	5	44.3149	5	36973.6	28	0.07	5	25423.3	5	4446.9	4	1392.31	10	4.92078e+07	7	2.38724e+07	6	2.76252e+07	54	470.004	1.75	3.72388	7	8965.1	5	1688.76	150
6	11	610.065	8.04	903.296	2.27051	44.1612	6	21.1	6	96260.8	0.75	41.8	1.16667	44.75	7	19451	3	7.41488	5	4.0815e+07	8	223125	6	43.9483	6	40001.7	35	0.085	6	26596.1	6	5207.7	5	1674.82	11	7.36946e+07	8	3.95128e+07	7	32789753	66	589.083	2	4.913	8	10587.4	6	2213.48	180
7	12	468.26	9	1000	2.59835	46.6712	15	47	7	157639	0.833333	39.1	1.25	40.375	8	20850	3.5	9.261	6	49307239	9	244499	7	42.7655	7	71473.4	42	0.11	7	27025.1			6	1870.36	12	6.56807e+07	9	5.98682e+07	8	4.62379e+07	78	706.29	2.25	6.33162	9	12223.8	7	2677.72	210
8	13	538.625	9.96	962.967	2.62799	50.4781	61	74	8	223771	0.916667	38.075	1.41667	45.3	9	25048.4	4	11.6971	7	5.43369e+07	10	252370	8	51.4242	8	49836	49	0.115	8	29405.3			7	2156.2	13	1.05171e+08	10	65228800	9	52734375	90	899.564	2.5	7.52954	11	14022.4	8	3340.12	420
9	14	763.591	11.04	962.967	2.73755	62.1358			9	194824	1	38.05	1.5	42.15	10	23170.5	4.5	15.8133	8	6.51746e+07	11	293311	9	68.8104			56	0.125	9	29767.6			8	2230.72	14	110592000	11	7.10174e+07			102	727.482	2.75	8	10	15127.5	9	3745.54	450
10	15	1039.47	12	1037.97	2.77062	88.5878			10	328509	1.08333	39.26	1.58333	47.0333			5	18.8211	9	7.59912e+07	12	300763	10	65.6947			63	0.135	11	31879.7			9	2333.67	15	89915392	12	75686967			114	874.408	3	8.74182					480
11	16	1242.84	12.96	1000	2.98651	106.819			11	422508	1.16667	42.34	1.66667	45.7333			5.5	23.1491	10	8.07565e+07	13	405224					70	0.145	12	29139.8			10	2293.43	16	117649000	14	97000736			126	926.859	3.25	9.6636					510
12	17	1289.38	14.04	1295.03	2.91866	110.395			12	708142	1.25	45.1111	1.75	45.85			6	28.3726	11	78402752	14	343000					73.5	0.135	13	40936			11	2296.55	17	104505975	15	90552524			138	768.575	3.5	9.93838					540
13	18	1434.14	15	1471.82	3.0192	119.438			13	980923	1.33333	45.35	1.83333	39.85			6.5	35.6113	12	8.78514e+07	19	456533					84	0.135	14	41686.2			12	2576.73	18	93741466	17	124305391			150	866.886	3.75	10.648					570
14	19	1721.05	15.96	1895.12	2.94546	124.073			14	1.08955e+06	1.41667	47	2.16667	46.95			7	39.304	14	96702579							87.5	0.14	15	33428			13	2668.21	19	117649000	23	126506008			162	902.129	4	11.0896					780
15	20	1810.5	17.04	2460.38	3.22929	148.554			15	1.17202e+06	1.5	41.3857	2.25	48.1			7.5	46.656											16	28395.5			14	2382.81	21	116214272	24	111980168			174	930.349	4.25	11.6971					810
16	21	2086.41	18	2529.35	3.19724	181.891			16	802628	1.58333	42.7	2.33333	49.8															17	52227			15	2493.71	27	144703125	25	9.96752e+07			186	843.909	4.5	12.167					840
17	22	2140.37	18.96	2671.15	3.45442	206.516			17	860085	1.66667	43.3	2.5	45.62																			16	2573.31	43	160989184	32	133432831			198	870.487	4.75	12.9779					900
18	23	2194.55	20.04	2744	3.37485	220.037			18	746143	1.75	43.1167	2.58333	46																			17	2380.75			34	182284263			210	807.605	5	13.4813					870
19	24	2121.85	20.88	3048.62	3.34253	235.382			19	2.1417e+06	1.83333	39.2857	2.66667	51.3																			18	2110.75			50	108531333			222	911.262	5.25	14.1725					930
20	25	2422.79	21	2647.16					23	1.24924e+06	1.91667	40.95	2.75	50.85																			20	2368							234	964.43							1170
21	26	2710.02	21.96	3048.62					25	1.40869e+06	2.08333	55.6																													246	746.143							1140
22	27	2926	23.04	2685.62							2.16667	50.4385																													258	932.575							1200
23	28	3273.63	24	2685.62							2.25	52.7																													270	986.263							1260
24	29	3295.21	24.96	3128.15							2.33333	49.6625																													282	1021.91							1230
25	30	3217.92	26.04	2970.46							2.41667	48.1																													294	1081.63
26	31	3366.52	27	2818.16							2.5	51.7333																													306	1226.76
27	32	3719.53	27.96	3442.95							2.58333	48.625																													318	1028.26
28	33	3690.71	28.92	4096							2.66667	58.2																													330	1081.63
29	34	3774.06	29.04	3048.62							2.75	44.7																													342	941.192
30	35	3692.27	30	3723.88							2.83333	43.5																													354	1110.86
31	36	4033.38	30.96	4096							3.33333	57.3667																													366	1000
32	37	3878.96	32.04	4096							3.41667	62.25																													390	967.362
33	38	3952.66	33	4096							3.5	47.4																													402	1200.03
34	39	4440.95	33.96	4096																																					414	1185.41
35	40	4709.61	35.04	4096																																					426	1595.46
36	41	4639.37	36	4096																																					438	1680.91
37	42	4812.91																																							450	1177.58
38	43	4794.66																																							462	1061.21
39	44	5166.38																																							474	1395.54
40	45	5338.75																																							522	1672.45
41	46	5214.08																																							546	1408.69
42	47	5298.33																																							570	1618.1
43	49	5681.68
44	51	5813.45
45	52	5982.48
46	53	6136.83
47
48
49
50
51
52
53
54
55
56
57
58
59
60
61
62
63
64
65
66
67
68
69
70
71
72
73
74
75
76
77
78
79
80
81
82
83
84
85
86
87
88
89
90
91
92
93
94
95
96
97
98
99
100
101
102
103
104
105
106
107
108
109
110
111
112
113
114
115
116
117
118
119
120
121
122
123
124
125
126
127
128
129
130
131
132
133
134
135
136
137
138
139
140
141
142
143
144
145
146
147
148
[truncated: 71 more columns]
